# Supplementary material for: Identification and Molecular Docking Study of a Novel Angiotensin-I Converting Enzyme Inhibitory Peptide Derived from Enzymatic Hydrolysates of Cyclina sinensis
Source: PubMed Central journal article supplement (PMC6265983; doi:10.3390/md16110411), 2018-10-27
Supplement: marinedrugs-16-00411-s001.pdf [file marinedrugs-16-00411-s001.pdf]

**Table S1.** All docking conformations of the pentapeptide WPMGF for ACE.

| Conformational ranking | Binding energy (KJ mol <sup>-1</sup> ) | Ligand efficiency | Inhibition constant (μM) |
|------------------------|----------------------------------------|-------------------|--------------------------|
| 1                      | -29.97                                 | -0.16             | 5.57                     |
| 2                      | -28.67                                 | -0.16             | 9.34                     |
| 3                      | -27.55                                 | -0.15             | 14.78                    |
| 4                      | -27.42                                 | -0.15             | 15.47                    |
| 5                      | -27.38                                 | -0.15             | 15.89                    |
| 6                      | -25.50                                 | -0.14             | 33.88                    |
| 7                      | -25.00                                 | -0.14             | 41.66                    |
| 8                      | -23.95                                 | -0.13             | 62.63                    |
| 9                      | -23.49                                 | -0.13             | 76.36                    |
| 10                     | -23.45                                 | -0.13             | 77.63                    |
| 11                     | -22.74                                 | -0.12             | 102.21                   |
| 12                     | -22.53                                 | -0.12             | 112.27                   |
| 13                     | -22.45                                 | -0.12             | 115.24                   |
| 14                     | -22.36                                 | -0.12             | 119.94                   |
| 15                     | -22.24                                 | -0.12             | 126.08                   |
| 16                     | -22.11                                 | -0.12             | 132.18                   |
| 17                     | -21.44                                 | -0.12             | 173.57                   |
| 18                     | -21.02                                 | -0.11             | 204.35                   |
| 19                     | -20.98                                 | -0.11             | 207.72                   |
| 20                     | -20.94                                 | -0.11             | 212.18                   |
| 21                     | -20.94                                 | -0.11             | 213.30                   |
| 22                     | -20.90                                 | -0.11             | 217.71                   |
| 23                     | -20.44                                 | -0.11             | 261.03                   |
| 24                     | -20.27                                 | -0.11             | 278.45                   |
| 25                     | -19.65                                 | -0.11             | 360.41                   |
| 26                     | -19.44                                 | -0.11             | 390.42                   |
| 27                     | -18.64                                 | -0.10             | 541.06                   |
| 28                     | -18.52                                 | -0.10             | 566.35                   |
| 29                     | -18.48                                 | -0.10             | 572.59                   |
| 30                     | -18.48                                 | -0.10             | 574.95                   |
| 31                     | -18.10                                 | -0.10             | 675.09                   |
| 32                     | -17.81                                 | -0.10             | 749.26                   |
| 33                     | -17.43                                 | -0.09             | 874.01                   |
| 34                     | -16.84                                 | -0.09             | 1120                     |
| 35                     | -16.47                                 | -0.09             | 1280                     |
| 36                     | -16.30                                 | -0.09             | 1370                     |
| 37                     | -15.84                                 | -0.09             | 1670                     |
| 38                     | -15.76                                 | -0.09             | 1730                     |
| 39                     | -15.26                                 | -0.08             | 2110                     |
| 40                     | -15.09                                 | -0.08             | 2270                     |
| 41                     | -13.75                                 | -0.07             | 3900                     |
| 42                     | -13.67                                 | -0.07             | 4000                     |
| 43                     | -13.33                                 | -0.07             | 4610                     |
| 44                     | -13.17                                 | -0.07             | 4910                     |
| 45                     | -11.24                                 | -0.06             | 10610                    |
| 46                     | -10.32                                 | -0.06             | 15350                    |
| 47                     | -10.07                                 | -0.05             | 17100                    |
| 48                     | -9.78                                  | -0.05             | 19160                    |
| 49                     | -9.66                                  | -0.05             | 20350                    |
| 50                     | -3.38                                  | -0.02             | 253970                   |

```
binding energy range in this cluster of 1 is 0.00
binding_energy=-7.17
ligand_efficiency=-0.16
inhib_constant=5.57
inhib_constant_units=uM
intermol_energy=-11.94
vdw_hb_desolv_energy=-10.7
electrostatic_energy=-1.24
total_internal=-1.74
torsional_energy=4.77
unbound_energy=-1.74
filename=WPMGF.dlg
cIRMS=0.0
refRMS=68.68
rseed1=None
rseed2=None
```

**Figure S1.** The calculation of binding energy between pentapeptide WPMGF and ACE

$$\begin{aligned}\Delta G_{\text{binding}} &= \Delta G_{\text{vdW+hb+desolv}} + \Delta G_{\text{elec}} + \Delta G_{\text{intern}} + \Delta G_{\text{tor}} - \Delta G_{\text{unb}} \\ &= -10.7 - 1.24 - 1.74 + 4.77 - (-1.74) = -7.17 \text{ kcal/mol} = -29.97 \text{ kJ/mol}\end{aligned}$$
